# Supplementary material for: Rare Solid Pancreatic Lesions on Cross-Sectional Imaging
Source: MDPI journal article supplement (doi:10.3390/diagnostics13162719), 2023-08-21
Supplement: s1 [file s1]

**Table S1.** Summary of rare benign solid pancreatic lesions.

|                                                                                                                                                                                                                                                               | <b>IST</b>                                          | <b>PT</b>                                                                                                                                                                                                                                                                                                                                                              | <b>SSCA</b>                                                             |
|---------------------------------------------------------------------------------------------------------------------------------------------------------------------------------------------------------------------------------------------------------------|-----------------------------------------------------|------------------------------------------------------------------------------------------------------------------------------------------------------------------------------------------------------------------------------------------------------------------------------------------------------------------------------------------------------------------------|-------------------------------------------------------------------------|
| <b>Demographics</b>                                                                                                                                                                                                                                           | ?                                                   | 4 <sup>th</sup> - 5 <sup>th</sup> decade.<br>Immunosuppression.                                                                                                                                                                                                                                                                                                        | Women 7 <sup>th</sup> decade.                                           |
| <b>Laboratory</b>                                                                                                                                                                                                                                             | -                                                   | -                                                                                                                                                                                                                                                                                                                                                                      | -                                                                       |
| <b>Prognosis</b>                                                                                                                                                                                                                                              | Benign                                              | Good                                                                                                                                                                                                                                                                                                                                                                   | Benign                                                                  |
| <b>Location</b>                                                                                                                                                                                                                                               | Tail                                                | Body, head                                                                                                                                                                                                                                                                                                                                                             | ?                                                                       |
| <b>Appearance</b>                                                                                                                                                                                                                                             | Well-defined.                                       | Well-defined.<br>Focal mass.<br>Multiple small<br>nodules.<br>Diffuse involvement.                                                                                                                                                                                                                                                                                     | Well-defined                                                            |
| <b>Enhancement</b>                                                                                                                                                                                                                                            | Hypervascular.<br>Same as spleen.<br>Zebra pattern. | Peripheral<br>enhancement.                                                                                                                                                                                                                                                                                                                                             | Rapid arterial<br>enhancement.<br>Isodensity/intensity<br>portal phase. |
| <b>Calcification</b>                                                                                                                                                                                                                                          | -                                                   | ++                                                                                                                                                                                                                                                                                                                                                                     | -                                                                       |
| <b>Haemorrhagic<br/>content</b>                                                                                                                                                                                                                               | -                                                   | -                                                                                                                                                                                                                                                                                                                                                                      | ++                                                                      |
| <b>Cysts</b>                                                                                                                                                                                                                                                  | -                                                   | ++                                                                                                                                                                                                                                                                                                                                                                     | -                                                                       |
| <b>Necrosis</b>                                                                                                                                                                                                                                               | -                                                   | -                                                                                                                                                                                                                                                                                                                                                                      | -                                                                       |
| <b>MPD dilatation</b>                                                                                                                                                                                                                                         | -                                                   | Rare                                                                                                                                                                                                                                                                                                                                                                   | Rare                                                                    |
| <b>Vascular invasion</b>                                                                                                                                                                                                                                      | -                                                   | -/+                                                                                                                                                                                                                                                                                                                                                                    | -                                                                       |
| <b>TIP</b>                                                                                                                                                                                                                                                    | Prior splenic surgery<br>or trauma.<br>High DWI SI. | Peripancreatic<br>necrotic<br>adenopathies.                                                                                                                                                                                                                                                                                                                            | MRCP: cysts                                                             |
| <b>Differential<br/>diagnosis</b>                                                                                                                                                                                                                             | pNEN<br>SPT<br>Hypervascular<br>metastasis.         | <b>Solid appearance:</b> <ul style="list-style-type: none"> <li>• PDAC</li> <li>• Lymphoma</li> <li>• Metastasis</li> </ul> <b>Cystic appearance:</b> <ul style="list-style-type: none"> <li>• Cystadenoma</li> <li>• Pseudocyst</li> <li>• Abscess</li> </ul> <b>Diffuse involvement:</b> <ul style="list-style-type: none"> <li>• Acute<br/>pancreatitis.</li> </ul> | pNEN<br>SPT<br>Hypervascular<br>metastasis.                             |
| <i>IST</i> Intrapancreatic splenic tissue, <i>PDAC</i> Pancreatic ductal adenocarcinoma,<br><i>pNEN</i> Pancreatic neuroendocrine tumour, <i>PT</i> Pancreatic tuberculosis,<br><i>SPT</i> Solid pseudopapillary tumour, <i>SSCA</i> Solid serous cystadenoma |                                                     |                                                                                                                                                                                                                                                                                                                                                                        |                                                                         |

**Table S2.** Summary of rare potentially malignant solid pancreatic lesions.

|                                                                                                                                                                                                                                                                                                                                                                                                                                           | <b>SPT</b>                                                                            | <b>PS</b>                                                                                   | <b>INEN</b>                                                | <b>PSFT</b>                                                                        |
|-------------------------------------------------------------------------------------------------------------------------------------------------------------------------------------------------------------------------------------------------------------------------------------------------------------------------------------------------------------------------------------------------------------------------------------------|---------------------------------------------------------------------------------------|---------------------------------------------------------------------------------------------|------------------------------------------------------------|------------------------------------------------------------------------------------|
| <b>Demographics</b>                                                                                                                                                                                                                                                                                                                                                                                                                       | Women < 40 y.o.<br>Men: older,<br>aggressive<br>behaviour.                            | 5 <sup>th</sup> decade.<br>10% association<br>NF2.<br>Rarely NF1 and risk<br>of malignancy. | ?                                                          | 6th decade                                                                         |
| <b>Laboratory</b>                                                                                                                                                                                                                                                                                                                                                                                                                         | -                                                                                     | -                                                                                           | Non-functioning<br>pNEN.                                   | Recurrent<br>hypoglycemia.                                                         |
| <b>Prognosis</b>                                                                                                                                                                                                                                                                                                                                                                                                                          | Good if R0<br>resection,<br>even if metastatic.<br><br>Malignant<br>behaviour 10-15%. | Good.<br><br>Malignant<br>transformation<br>possible.                                       | ?                                                          | Good if R0<br>resection.<br><br>12-22%<br>malignant.                               |
| <b>Location</b>                                                                                                                                                                                                                                                                                                                                                                                                                           | Tail                                                                                  | Head                                                                                        | ?                                                          | Head                                                                               |
| <b>Appearance</b>                                                                                                                                                                                                                                                                                                                                                                                                                         | Well-defined.<br>Large.<br>Heterogeneous.<br><br>Homogeneous if<br>small              | Well-defined.<br>Solid-cystic.                                                              | Purely<br>intraductal.<br><br>Distal pancreas<br>atrophic. | Well-defined.<br>Large.<br>Heterogeneous.<br><br>Homogeneous if<br>small           |
| <b>Enhancement</b>                                                                                                                                                                                                                                                                                                                                                                                                                        | ++                                                                                    | Determined by<br>proportion<br>solid/cystic<br>components                                   | +++                                                        | ++                                                                                 |
| <b>Calcification</b>                                                                                                                                                                                                                                                                                                                                                                                                                      | +                                                                                     | -/+ if large                                                                                | ?                                                          | ++if large                                                                         |
| <b>Hemorrhagic<br/>content</b>                                                                                                                                                                                                                                                                                                                                                                                                            | ++                                                                                    | -/+ if large                                                                                | ?                                                          | +if large                                                                          |
| <b>Cysts</b>                                                                                                                                                                                                                                                                                                                                                                                                                              | ++                                                                                    | -/+                                                                                         | ?                                                          | ++if large                                                                         |
| <b>Necrosis</b>                                                                                                                                                                                                                                                                                                                                                                                                                           | ++                                                                                    | -/+ if large                                                                                | ?                                                          | +++ if large                                                                       |
| <b>MPD dilatation</b>                                                                                                                                                                                                                                                                                                                                                                                                                     | -/+ if malignant                                                                      | -                                                                                           | ++                                                         | -/+ if malignant                                                                   |
| <b>Vascular invasion</b>                                                                                                                                                                                                                                                                                                                                                                                                                  | +if malignant                                                                         | +if malignant                                                                               | -                                                          | -                                                                                  |
| <b>TIP</b>                                                                                                                                                                                                                                                                                                                                                                                                                                | Fibrous<br>pseudocapsule.<br>Fluid-fluid levels.                                      | Hypermetabolic on<br>PET-CT even if<br>benign.                                              | May be obscured<br>if causing acute<br>pancreatitis.       | Hypervascular.<br>Adenopathies<br>rare.<br>PET-CT not<br>useful for<br>malignancy. |
| <b>Differential<br/>diagnosis</b>                                                                                                                                                                                                                                                                                                                                                                                                         | pNEN.<br>Hypervascular<br>metastasis.                                                 | SPT<br>pNEN<br>SSCA                                                                         | Chronic<br>pancreatitis.                                   | pNEN<br>PPLM<br>GIST<br>PEComa<br>SPT                                              |
| <p><i>GIST</i> gastrointestinal stromal tumour, <i>INEN</i> Intraductal Neuroendocrine Neoplasm,<br/> <i>PEComa</i> perivascular epithelioid cell tumour,<br/> <i>pNEN</i> Pancreatic neuroendocrine tumour, <i>PPLM</i> Primary pancreatic leiomyosarcoma, <i>PS</i><br/> Pancreatic schwannoma, <i>PSFT</i> Pancreatic solitary fibrous tumour,<br/> <i>SPT</i> Solid pseudopapillary tumour, <i>SSCA</i> Solid serous cystadenoma.</p> |                                                                                       |                                                                                             |                                                            |                                                                                    |

**Table S3.** Summary of rare malignant solid pancreatic lesions.

|                                | ACC                                                                                  | UCOGC                                                        | PASC                                                                                         | CC                                                                           | PPLM                                                                    | PPL                                                                                                         | SPL                                                                                                                      | PM                                                                  |
|--------------------------------|--------------------------------------------------------------------------------------|--------------------------------------------------------------|----------------------------------------------------------------------------------------------|------------------------------------------------------------------------------|-------------------------------------------------------------------------|-------------------------------------------------------------------------------------------------------------|--------------------------------------------------------------------------------------------------------------------------|---------------------------------------------------------------------|
| <b>Demographics</b>            | Men>women.<br>Bimodal:<br>8-15 y.o<br>7 <sup>th</sup> decade                         | Women>>men<br>Middle aged<br>and elderly.                    | Men>women.<br>6 <sup>th</sup> decade.                                                        | 7 <sup>th</sup> decade.                                                      | 5 <sup>th</sup> decade.<br>East Asian<br>ethnicity.                     | Men ><br>women.<br>5 <sup>th</sup> decade.<br>Immunosup<br>pression.                                        | Known<br>lymphoma.<br>More frequent<br>than PPL.                                                                         | Known<br>primary<br>tumour:<br>RCC,<br>gastric,<br>breast,<br>lung. |
| <b>Laboratory</b>              | ↑ Lipase.<br>↑ Alpha-<br>fetoprotein.<br>Peripheral<br>eosinophilia.                 | N/↑CEA<br>N/↑CA19-9                                          | ↑CEA<br>↑CA19-9<br>Hypercalc<br>emia                                                         | ↑CEA<br>↑CA19-9                                                              | -                                                                       | ↑LDH                                                                                                        | ↑LDH                                                                                                                     | -                                                                   |
| <b>Prognosis</b>               | 5-year<br>survival rate<br>50%                                                       | 5-year<br>survival rate<br>> 50%.<br>Variable.               | Median<br>overall<br>survival<br>after<br>surgery 1<br>year.                                 | 5-year<br>survival rate<br>57%.                                              | 48 months                                                               | Long-term<br>regression/r<br>emission.                                                                      | Long-term<br>regression/re<br>mission.                                                                                   | Depends<br>on<br>primary<br>tumour.                                 |
| <b>Location</b>                | -                                                                                    | Body-tail                                                    | Head                                                                                         | Head                                                                         | -                                                                       | Head                                                                                                        | -                                                                                                                        | -                                                                   |
| <b>Appearance</b>              | Large.<br>Well-<br>defined.<br>Exophytic.                                            | Large.<br>Locally<br>aggressive.                             | Round.<br>Lobulated.                                                                         | Large.<br>Lobulated.<br>Ill-defined.<br>Intraluminal<br>if IPMN-<br>related. | Large.<br>Heterogeneou<br>s.                                            | <i>Focal pattern:</i><br>Homogeneous<br>Large<br><br><i>Other:</i><br>Diffuse<br>Peripheral<br>Multinodular | Peripancreatic<br>adenopathy<br>with pancreas<br>invasion.<br><br>Same patterns<br>as primary<br>pancreatic<br>lymphoma. | Single.<br>Multiple<br>.<br>Diffuse.                                |
| <b>Enhancement</b>             | -Arterial<br>phase<br>+ Portal<br>phase                                              | -/+                                                          | +                                                                                            | Progressive<br>and delayed.<br>Sponge-like.                                  | +                                                                       | Limited.<br>Progressive.<br>Delayed.                                                                        | +                                                                                                                        | Like<br>primary<br>tumour                                           |
| <b>Calcification</b>           | -/+ if large                                                                         | -/+                                                          | -                                                                                            | ++                                                                           | -                                                                       | -                                                                                                           | -                                                                                                                        | Like<br>primary<br>tumour                                           |
| <b>Hemorrhagic<br/>content</b> | -/+ if large                                                                         | -/+                                                          | -                                                                                            | -                                                                            | -/+ (if large)                                                          | -                                                                                                           | -                                                                                                                        | Like<br>primary<br>tumour                                           |
| <b>Cysts</b>                   | -/(if large)                                                                         | +                                                            | -                                                                                            | -                                                                            | -/(if large)                                                            | -                                                                                                           | -                                                                                                                        | -                                                                   |
| <b>Necrosis</b>                | -/+ if large                                                                         | -/+                                                          | ++                                                                                           | -                                                                            | -/+ if large                                                            | -                                                                                                           | -                                                                                                                        | Like<br>primary<br>tumour                                           |
| <b>MPD dilatation</b>          | -                                                                                    | +                                                            | +                                                                                            | -/+                                                                          | -                                                                       | -                                                                                                           | -                                                                                                                        | -                                                                   |
| <b>Vascular<br/>invasion</b>   | -/+                                                                                  | +                                                            | -/+                                                                                          | -/+                                                                          | -/+                                                                     | -                                                                                                           | -                                                                                                                        | -                                                                   |
| <b>TIP</b>                     | May be<br>exophytic.<br>Enhancing<br>capsule.<br><br>Adenopathi<br>es and<br>hepatic | Invasive.<br><br>Adenopathi<br>es and<br>metastases<br>rare. | Central<br>high SI<br>T2WI.<br>Enhancing<br>capsule.<br>Locally<br>advanced /<br>metastatic. | ↑ High T2 SI.<br><br>Salt&pepper<br>pattern.                                 | Adenopathies<br>rare.<br><br>Metastases<br>frequent at<br>presentation. | High DWI<br>signal.<br><br>If infrarenal<br>retroperiton<br>eal<br>adenopathy,                              | Known or<br>suspected<br>lymphoma.                                                                                       | Advance<br>d<br>disease.<br><br>Long<br>latency.                    |

[illegible]
